# Supplementary material
Source: PubMed Central journal article supplement (PMC7042954)
Supplement: NIHMS1561389-supplement-1.pdf [file NIHMS1561389-supplement-1.pdf]

## Supplementary Text

### *Competency-Assessment Tool and Grading Protocol*

For ERCP, relevant technical end points included ability to perform deep cannulation of the desired duct, sphincterotomy, stone clearance, stent insertion, and advanced cannulation techniques (double-wire technique, placement of pancreatic duct, precut sphincterotomy). Examples of cognitive end points included demonstration of clear understanding of indication, appropriate use of fluoroscopy, and logical plan that was based on cholangiogram/pancreatogram findings.

For EUS, technical aspects included clear identification of important landmarks at various EUS stations and performance of FNA. Cognitive aspects included identification of lesion of interest, appropriate TNM (tumor, node, metastases) stage, and appropriate differential diagnosis and management plan.

### *Comprehensive Data Collection and Reporting System*

This centralized database was stored at the University of Colorado's instance of REDCap (Research Electronic Data Capture, Vanderbilt University, Nashville, TN) that resided on a local secure server. Data regarding grading of EUS and ERCP exams were entered by research coordinators at all participating centers into the REDCap database. By using a combination of an Application Programming Interface, REDCap, and SAS (v.9.3; SAS Institute, Cary, NC), graphic representations of overall and individual end point learning curves were generated by using CUSUM on demand. Access to these data was controlled by a custom module that determined authentication and role-based levels of access.

### *Statistical Analysis*

By continuously studying the control charts, the performance of each individual trainee was compared with a predetermined standard, allowing for the detection of negative trends and enabling earlier feedback (which consisted of either re-training or continued observation) This approach to assess competence has been widely described in healthcare and specifically in the field of endoscopic procedure learning (upper endoscopy, colonoscopy, EUS, ERCP, and advanced imaging techniques).<sup>1-11</sup> Bolsin and Colson<sup>11</sup> published a summary of CUSUM analysis, which is summarized as follows. Successful procedures are given a score of  $s$ , and failed procedures are given a score of  $1 - s$ . These values are based on pre-specified acceptable failure rates ( $p_0$ , level of inherent error if procedures are performed competently) and unacceptable failures rates ( $p_1$ , where

$p_1-p_0$  represents the maximum acceptable level of human error). For this study, we used  $p_0 = 0.1$  and  $p_1 = 0.3$ . CUSUM scores were then calculated by using the following formulas:  $P = 1n(p_1/p_0)$ ;  $Q = 1n[(1-p_1)/(1-p_0)]$ ; and  $s = Q/(P+Q) = 0.15$ , and  $1 - s = 0.85$ . The CUSUM curve was created by plotting the cumulative sum after each case against the index number of that case, and  $C_n$  is the sum of all individual outcome scores. The CUSUM graph was designed to signal when  $C_n$  crosses predetermined limits. These limits are displayed as horizontal lines of the graph and calculated on the basis of the risk for type I ( $\alpha$ ) and type II ( $\beta$ ) error, which was set at 0.1 for this analysis. The formulae for  $H_0$  and  $H_1$  are as follows:  $H_1 = a / (P+Q)$  and  $H_0 = -b / (P+Q)$ , where  $a = 1n[(1 - \beta)/\alpha]$  and  $b = 1n[(1 - \alpha)/\beta]$ . If the CUSUM plot fell below the acceptable line, the performance was acceptable with the predetermined type II error; if the CUSUM plot rose above the unacceptable line, the performance was considered unacceptable; if the plot stayed between the 2 boundary lines, no conclusion could be drawn, and further training was recommended.

The strength of rater agreement was categorized by using criteria proposed by Landis and Koch<sup>12</sup>: 0.00–0.20, slight; 0.21–0.40, fair; 0.41–0.60, moderate; 0.61–0.80, substantial; 0.81–1.00, almost perfect.

## Results

### *Sensitivity Analyses*

A smaller proportion of AETs achieved competence in the overall technical and cognitive aspects of EUS and ERCP and individual end points. Similar results were noted when learning curves were analyzed by using a more stringent acceptable failure rate of 5% and unacceptable failure rates of 10%–20% (data not shown).

## Discussion

Approximately 50% of AETs planned to practice at academic medical centers. This appears to be in line with results from a recent study surveying recent advanced endoscopy fellowship graduates, which found that slightly more than half were in academic practices. With regard to ERCP volume, 39% of those in private practice and 65% of those in academic practice were performing >200 ERCPs/year. This study also found that there was a strong perception that the job market was saturated for AETs, with most programs having difficulty placing their AETs in advanced endoscopy positions.<sup>13</sup> This raises into question the potential lack of career options for AETs, the ability to attain the volume of cases needed in the first year to grow skills, and whether there are currently too many advanced endoscopy training programs.

## References

1. Wani S, Hall M, Keswani RN, et al. Variation in aptitude of trainees in endoscopic ultrasonography, based on cumulative sum analysis. *Clin Gastroenterol Hepatol* 2015;13:1318–1325 e2.
2. Wani S, Cote GA, Keswani R, et al. Learning curves for EUS by using cumulative sum analysis: implications for American Society for Gastrointestinal Endoscopy recommendations for training. *Gastrointest Endosc* 2013;77:558–565.
3. Wani S, Hall M, Wang AY, et al. Variation in learning curves and competence for ERCP among advanced endoscopy trainees by using cumulative sum analysis. *Gastrointest Endosc* 2016;83:711–719 e11.
4. Salowi MA, Choong YF, Goh PP, et al. CUSUM: a dynamic tool for monitoring competency in cataract surgery performance. *Br J Ophthalmol* 2010;94:445–449.
5. Lee YK, Ha YC, Hwang DS, et al. Learning curve of basic hip arthroscopy technique: CUSUM analysis. *Knee Surg Sports Traumatol Arthrosc* 2013;21:1940–1944.
6. Smith SE, Tallentire VR. The right tool for the right job: the importance of CUSUM in self-assessment. *Anaesthesia* 2011;66:747, author reply, 747–748.
7. Patel SG, Rastogi A, Austin G, et al. Gastroenterology trainees can easily learn histologic characterization of diminutive colorectal polyps with narrow band imaging. *Clin Gastroenterol Hepatol* 2013;11:997–1003 e1.
8. Ward ST, Mohammed MA, Walt R, et al. An analysis of the learning curve to achieve competency at colonoscopy using the JETS database. *Gut* 2014;63:1746–1754.
9. Schlup MM, Williams SM, Barbezat GO. ERCP: a review of technical competency and workload in a small unit. *Gastrointest Endosc* 1997;46:48–52.
10. Ward ST, Hancox A, Mohammed MA, et al. The learning curve to achieve satisfactory completion rates in upper GI endoscopy: an analysis of a national training database. *Gut* 2017;66:1022–1033.
11. Bolsin S, Colson M. The use of the Cusum technique in the assessment of trainee competence in new procedures. *Int J Qual Health Care* 2000;12:433–438.
12. Landis JR, Koch GG. The measurement of observer agreement for categorical data. *Biometrics* 1977;33:159–174.
13. Granato CM, Kaul V, Kothari T, et al. Career prospects and professional landscape after advanced endoscopy fellowship training: a survey assessing graduates from 2009 to 2013. *Gastrointest Endosc* 2016;84:266–271.

---

## The EUS and ERCP Skills Assessment Tool (TEESAT)

---

Institution: \_\_\_\_\_ Assigned Code: \_\_\_\_\_

### **Advanced Endoscopy Trainee Baseline Questionnaire**

1. **When and where** did you complete your general GI fellowship?

\_\_\_\_\_

2. Did you receive any formal training on the cognitive aspects for EUS?

yes  no

If yes, **please elaborate:**

Lectures  Consult Service  Clinic  Conferences

3. Did you perform any EUS exams with **hands on** experience during your general GI fellowship?

yes  no

If yes, **how many** EUS exams did you perform during your general GI fellowship?

\_\_\_\_\_

4. Did you receive any formal training on the cognitive aspects for ERCP?

yes  no

If yes, **please elaborate:**

Lectures  Consult Service  Clinic  Conferences

5. Did you perform any ERCP exams with **hands on** experience during your general GI fellowship?

yes  no

If yes, **how many** ERCP exams did you perform during your general GI fellowship?

\_\_\_\_\_

**Supplementary  
Figure 1.** Baseline  
questionnaire.

## Post Study Assessment

---

### Advanced Endoscopy Fellowship Year:

1. How many EUS procedures did you perform during your fellowship? \_\_\_\_\_
2. How many ERCP procedures did you perform during your fellowship? \_\_\_\_\_
3. I feel comfortable with independently performing ERCP at the end of my advanced endoscopy training (please circle an answer below)
 

strongly agree    tend to agree    neutral    tend to disagree    strongly disagree

  - a. How comfortable do you feel with performing sphincterotomy?
 

strongly agree    tend to agree    neutral    tend to disagree    strongly disagree
  - b. How comfortable do you feel with stone clearance (<1cm)?
 

strongly agree    tend to agree    neutral    tend to disagree    strongly disagree
  - c. How comfortable do you feel with placement of biliary stents?
 

strongly agree    tend to agree    neutral    tend to disagree    strongly disagree
  - d. How comfortable do you feel with placement of pancreatic stents?
 

strongly agree    tend to agree    neutral    tend to disagree    strongly disagree
4. I feel comfortable with independently performing EUS as the end of my advanced endoscopy training (please circle an answer below)
 

strongly agree    tend to agree    neutral    tend to disagree    strongly disagree

  - a. How comfortable do you feel in performing EUS-FNA?
 

strongly agree    tend to agree    neutral    tend to disagree    strongly disagree
  - b. How comfortable do you feel in performing CPB/CPN?
 

strongly agree    tend to agree    neutral    tend to disagree    strongly disagree
  - c. How comfortable do you feel in placement of fiducials?
 

strongly agree    tend to agree    neutral    tend to disagree    strongly disagree
5. Did the learning curves provided by this study enhance your advanced endoscopy fellowship (please circle an answer below)?
 

strongly agree    tend to agree    neutral    tend to disagree    strongly disagree

Comments:

### First Year of Independent Practice:

1. What type of environment will you be practicing in (circle one)?
  - a. Academic
  - b. Private
  - c. Combination of academic and private practice
2. Will you be joining a practice with a senior partner who performs high volume ERCP and/or EUS?
 

**Yes   or   No**
3. What % of your job will be "advanced" endoscopy?
 

**0%,          1-25%,          26-50%,          51-75%,          >75%**
4. How many EUS procedures do you estimate you will perform in the first year of independent practice?
 

\_\_\_\_\_
5. How many ERCP procedures do you estimate you will perform in the first year of independent practice?
 

\_\_\_\_\_

**Supplementary Figure 2.** Post-study questionnaire.

The EUS and ERCP Skills Assessment Tool (TEESAT)

**EUS**

Assigned Code: \_\_\_\_\_

**Indication for EUS (mark all that apply):**

- Radial  Linear
- Panc Mass       Biliary dilation       Abdominal/Mediastinal lymphadenopathy       Possible subepithelial lesion
- Panc Cyst       PD Dilation       Luminal GI cancer       Mediastinal mass
- Abdominal pain       Other: \_\_\_\_\_

**EUS: Technical Aspects:**

1 (superior) = achieves without instruction    2 (advanced) = achieves with minimal verbal cues  
 3 (intermediate) = achieves with multiple verbal cues or hands on assistance    4 (novice) = unable to complete  
 N/T = not attempted    N/A = not applicable

|                                         |   |   |   |   |     |     |
|-----------------------------------------|---|---|---|---|-----|-----|
| Intubation                              | 1 | 2 | 3 | 4 | N/T | N/A |
| AP window                               | 1 | 2 | 3 | 4 | N/T | N/A |
| Body of pancreas                        | 1 | 2 | 3 | 4 | N/T | N/A |
| Tail of pancreas                        | 1 | 2 | 3 | 4 | N/T | N/A |
| Head/neck of pancreas                   | 1 | 2 | 3 | 4 | N/T | N/A |
| Uncinate                                | 1 | 2 | 3 | 4 | N/T | N/A |
| Ampulla                                 | 1 | 2 | 3 | 4 | N/T | N/A |
| Gallbladder                             | 1 | 2 | 3 | 4 | N/T | N/A |
| CBD/CHD                                 | 1 | 2 | 3 | 4 | N/T | N/A |
| Portosplenic confluence                 | 1 | 2 | 3 | 4 | N/T | N/A |
| Celiac axis                             | 1 | 2 | 3 | 4 | N/T | N/A |
| Achieve FNA                             | 1 | 2 | 3 | 4 | N/T | N/A |
| Achieve celiac plexus block/ neurolysis | 1 | 2 | 3 | 4 | N/T | N/A |

**EUS: Cognitive Aspects**

|                                                                                      |   |   |   |   |     |     |
|--------------------------------------------------------------------------------------|---|---|---|---|-----|-----|
| Identify lesion of interest or appropriately ruled out                               | 1 | 2 | 3 | 4 | N/T | N/A |
| Appropriate TNM stage                                                                | 1 | 2 | 3 | 4 | N/T | N/A |
| Characterize subepithelial lesion (wall layers)                                      | 1 | 2 | 3 | 4 | N/T | N/A |
| Appropriate differential diagnosis                                                   | 1 | 2 | 3 | 4 | N/T | N/A |
| Appropriate management plan (FNA, refer to surgery, surveillance or no surveillance) | 1 | 2 | 3 | 4 | N/T | N/A |

The EUS and ERCP Skills Assessment Tool (TEESAT)

**Overall Assessment:**

| Overall Assessment (subjective)     |   |   |                               |   |   |                                     |   |   |                                |
|-------------------------------------|---|---|-------------------------------|---|---|-------------------------------------|---|---|--------------------------------|
| 1                                   | 2 | 3 | 4                             | 5 | 6 | 7                                   | 8 | 9 | 10                             |
| Below average for level of training |   |   | Average for level of training |   |   | Above average for level of training |   |   | Superior for level of training |

**Immediate Post-Procedure Complications:**

Procedure done in ambulatory setting?     Yes     No

Patient admitted post-procedure?     Yes     No

- If yes,
- Pain requiring hospitalization
  - Pancreatitis
    - Mild       Moderate       Severe
  - Bleeding
    - Immediate     Delayed
  - Perforation
  - Cardiopulmonary complications
  - Mortality
  - Other: \_\_\_\_\_

**Supplementary Figure 3.** The EUS and ERCP Skills Assessment Tool (TEESAT).

# The EUS and ERCP Skills Assessment Tool (TEESAT)

## ERCP

Assigned Code: \_\_\_\_\_

### Indication for ERCP (mark all that apply):

#### Biliary:

- Stent removal/change
- Suspected/established CBD stones
- Post-transplant stricture
- Stricture
  - Benign       Malignant       Indeterminate
  - Bismuth I     Bismuth II     Bismuth III     Bismuth IV
- Bile leak
- Cholangioscopy
- Suspected sphincter of Oddi dysfunction
- Other: \_\_\_\_\_

#### Pancreatic:

- Stricture
- Leak/fistula
- Recurrent acute pancreatitis
- Stent removal/change
- Suspected SOD
- Stone
- Minor papilla endotherapy
- Pancreatoscopy
- Other: \_\_\_\_\_

**FAILED ERCP from outside center?**  Yes     No

If yes,  Biliary     Pancreatic

### ASGE ERCP Degree of Difficulty Grade:

#### Biliary:

|                                                                                                                                                                                                                                                                                                                                         |                                                                                                                                                                                                                                                                  |                                                                                                                                                                                                                               |
|-----------------------------------------------------------------------------------------------------------------------------------------------------------------------------------------------------------------------------------------------------------------------------------------------------------------------------------------|------------------------------------------------------------------------------------------------------------------------------------------------------------------------------------------------------------------------------------------------------------------|-------------------------------------------------------------------------------------------------------------------------------------------------------------------------------------------------------------------------------|
| <b>Grade 1</b><br><input type="checkbox"/> Diagnostic cholangiogram<br><input type="checkbox"/> Biliary brush cytology<br><input type="checkbox"/> Standard sphincterotomy<br><input type="checkbox"/> +/- removal of stones < 10mm<br><input type="checkbox"/> Stricture dilation/stent for benign extrahepatic stricture or bile leak | <b>Grade 2</b><br><input type="checkbox"/> Diagnostic cholangiogram with BII anatomy<br><input type="checkbox"/> Removal of CBD stones >10mm<br><input type="checkbox"/> Stricture dilation/stent for hilar tumors or benign intrahepatic stricture or bile leak | <b>Grade 3</b><br><input type="checkbox"/> SOM<br><input type="checkbox"/> Cholangioscopy<br><input type="checkbox"/> Any therapy altered anatomy<br><input type="checkbox"/> Removal of intrahepatic stones with lithotripsy |
|-----------------------------------------------------------------------------------------------------------------------------------------------------------------------------------------------------------------------------------------------------------------------------------------------------------------------------------------|------------------------------------------------------------------------------------------------------------------------------------------------------------------------------------------------------------------------------------------------------------------|-------------------------------------------------------------------------------------------------------------------------------------------------------------------------------------------------------------------------------|

#### Pancreatic:

|                                                                                                                     |                                                                                                                                            |                                                                                                                                                                                                                                    |
|---------------------------------------------------------------------------------------------------------------------|--------------------------------------------------------------------------------------------------------------------------------------------|------------------------------------------------------------------------------------------------------------------------------------------------------------------------------------------------------------------------------------|
| <b>Grade 1</b><br><input type="checkbox"/> Diagnostic pancreatogram<br><input type="checkbox"/> Pancreatic cytology | <b>Grade 2</b><br><input type="checkbox"/> Diagnostic pancreatogram with BII anatomy<br><input type="checkbox"/> Minor papilla cannulation | <b>Grade 3</b><br><input type="checkbox"/> SOM<br><input type="checkbox"/> Pancreatoscopy<br><input type="checkbox"/> Any therapy altered anatomy<br><input type="checkbox"/> All pancreatic therapy including pseudocyst drainage |
|---------------------------------------------------------------------------------------------------------------------|--------------------------------------------------------------------------------------------------------------------------------------------|------------------------------------------------------------------------------------------------------------------------------------------------------------------------------------------------------------------------------------|

### Maneuvers (ALL ERCPs):

**1 (superior)** = achieves without instruction    **2 (advanced)** = achieves with minimal verbal cues  
**3 (intermediate)** = achieves with multiple verbal cues or hands on assistance    **4 (novice)** = unable to complete  
**N/T** = not attempted    **N/A** = not applicable

|                                     |   |   |   |   |     |     |
|-------------------------------------|---|---|---|---|-----|-----|
| <b>Intubation</b>                   | 1 | 2 | 3 | 4 | N/T | N/A |
| <b>Achieving the short position</b> | 1 | 2 | 3 | 4 | N/T | N/A |
| <b>Identifying the papilla</b>      | 1 | 2 | 3 | 4 | N/T | N/A |

|                                         |                              |                             |
|-----------------------------------------|------------------------------|-----------------------------|
| <b>Native papilla?</b>                  | <input type="checkbox"/> yes | <input type="checkbox"/> no |
| <b>Prior biliary sphincterotomy?</b>    | <input type="checkbox"/> yes | <input type="checkbox"/> no |
| <b>Prior pancreatic sphincterotomy?</b> | <input type="checkbox"/> yes | <input type="checkbox"/> no |

Supplementary Figure 3. Continued

# The EUS and ERCP Skills Assessment Tool (TEESAT)

## BILIARY ERCP

### Technical Aspects

1(**superior**) =achieves without instruction    2(**advanced**) =achieves with minimal verbal cues  
 3(**intermediate**) = achieves with multiple verbal cues or hands on assistance    4 (**novice**) =unable to complete  
 N/T= not attempted                      N/A= not applicable

|                                                  |                                                          |   |   |   |     |     |
|--------------------------------------------------|----------------------------------------------------------|---|---|---|-----|-----|
| Stent removal                                    | 1                                                        | 2 | 3 | 4 | N/T | N/A |
| Cannulation- Contrast visualization of bile duct | 1                                                        | 2 | 3 | 4 | N/T | N/A |
| Inadvertent cannulation of pancreatic duct       | <input type="checkbox"/> yes <input type="checkbox"/> no |   |   |   |     |     |
| Sphincterotomy                                   | <input type="checkbox"/> yes <input type="checkbox"/> no |   |   |   |     |     |
| <u>If yes</u>                                    | 1                                                        | 2 | 3 | 4 | N/T | N/A |
| Wire placement in desired (biliary) duct?        | <input type="checkbox"/> yes <input type="checkbox"/> no |   |   |   |     |     |
| <u>If yes</u>                                    | 1                                                        | 2 | 3 | 4 | N/T | N/A |
| Double-wire used to cannulate bile duct          | <input type="checkbox"/> yes <input type="checkbox"/> no |   |   |   |     |     |
| Wire placed in pancreatic duct?                  | 1                                                        | 2 | 3 | 4 | N/T | N/A |
| Cannulation of CBD achieved?                     | <input type="checkbox"/> yes <input type="checkbox"/> no |   |   |   |     |     |
| Cannulation of CBD?                              | 1                                                        | 2 | 3 | 4 | N/T | N/A |
| PD stent placed to facilitate BD cannulation?    | <input type="checkbox"/> yes <input type="checkbox"/> no |   |   |   |     |     |
| Wire placed in PD?                               | 1                                                        | 2 | 3 | 4 | N/T | N/A |
| PD stent placement?                              | 1                                                        | 2 | 3 | 4 | N/T | N/A |
| Cannulation of CBD achieved?                     | <input type="checkbox"/> yes <input type="checkbox"/> no |   |   |   |     |     |
| Cannulation of CBD?                              | 1                                                        | 2 | 3 | 4 | N/T | N/A |
| Pre-cut sphincterotomy?                          | 1                                                        | 2 | 3 | 4 | N/T | N/A |

Time to attempt cannulation of first duct of interest for trainee (To start when cannulating device out of duodenoscope)? \_\_\_\_\_ (in minutes)

If trainee cannulation failed, did supervisor succeed?     yes     no

Time for attending to achieve cannulation? \_\_\_\_\_ (in minutes)

Technique used to achieve cannulation?

Regular cannulation    Double-wire    PD Stent placement    Pre-cut sphincteromy

|                        |   |   |   |   |     |     |
|------------------------|---|---|---|---|-----|-----|
| Balloon sweep          | 1 | 2 | 3 | 4 | N/T | N/A |
| Use of basket          | 1 | 2 | 3 | 4 | N/T | N/A |
| Mechanical lithotripsy | 1 | 2 | 3 | 4 | N/T | N/A |
| Stone clearance        | 1 | 2 | 3 | 4 | N/T | N/A |
| Stricture dilation     | 1 | 2 | 3 | 4 | N/T | N/A |
| Stent insertion        | 1 | 2 | 3 | 4 | N/T | N/A |

### Cognitive Aspects

1(**superior**) =appropriate knowledge, requires no instruction    2(**advanced**) =achieves with minimal verbal cues  
 3(**intermediate**) = achieves with multiple verbal cues    4 (**novice**) =poor knowledge unable to achieve endpoint  
 N/T= not attempted                      N/A= not applicable

|                                                                                                                                     |   |   |   |   |     |     |
|-------------------------------------------------------------------------------------------------------------------------------------|---|---|---|---|-----|-----|
| Fellow demonstrated clear understanding of indication of procedure                                                                  | 1 | 2 | 3 | 4 | N/T | N/A |
| Cholangiogram                                                                                                                       | 1 | 2 | 3 | 4 | N/T | N/A |
| Appropriate use of fluoroscopy                                                                                                      |   |   |   |   |     |     |
| Proficient use of real time cholangiogram interpretation and ability to identify nature of pathology (stone, stricture, leak, etc.) | 1 | 2 | 3 | 4 | N/T | N/A |
| Logical plan based on cholangiogram findings                                                                                        | 1 | 2 | 3 | 4 | N/T | N/A |
| Fellow demonstrated clear understanding for appropriate use of rectal indomethacin?                                                 | 1 | 2 | 3 | 4 | N/T | N/A |

Supplementary Figure 3. Continued

The EUS and ERCP Skills Assessment Tool (TEESAT)

**PANCREATIC ERCP**

**Technical Aspects**

1(**superior**) =achieves without instruction 2(**advanced**) =achieves with minimal verbal cues  
 3(**intermediate**) = achieves with multiple verbal cues or hands on assistance  
 4 (**novice**) =unable to complete N/T= not attempted N/A= not applicable

|                                                        |                          |     |                          |    |     |     |
|--------------------------------------------------------|--------------------------|-----|--------------------------|----|-----|-----|
| Stent removal                                          | 1                        | 2   | 3                        | 4  | N/T | N/A |
| Cannulation-contrast visualization of pancreatic duct? | <input type="checkbox"/> | yes | <input type="checkbox"/> | no |     |     |
| Cannulation                                            | 1                        | 2   | 3                        | 4  | N/T | N/A |
| Sphincterotomy                                         | <input type="checkbox"/> | yes | <input type="checkbox"/> | no |     |     |
| If yes                                                 | 1                        | 2   | 3                        | 4  | N/T | N/A |
| Wire placement in desired (pancreatic) duct?           | <input type="checkbox"/> | yes | <input type="checkbox"/> | no |     |     |
| If yes                                                 | 1                        | 2   | 3                        | 4  | N/T | N/A |

Time to attempt cannulation of first duct of interest for trainee (To start when cannulating device out of duodenoscope)? \_\_\_\_\_ (in minutes)

If trainee cannulation failed, did supervisor succeed?  yes  no

Time for attending to achieve cannulation? \_\_\_\_\_ (in minutes)

Technique used to achieve cannulation?

Regular cannulation Double-wire PD Stent placement Pre-cut sphincteromy

|                    |                          |     |                          |    |     |     |
|--------------------|--------------------------|-----|--------------------------|----|-----|-----|
| Balloon sweep      | 1                        | 2   | 3                        | 4  | N/T | N/A |
| Use of basket      | 1                        | 2   | 3                        | 4  | N/T | N/A |
| Stone clearance    | 1                        | 2   | 3                        | 4  | N/T | N/A |
| Stricture dilation | 1                        | 2   | 3                        | 4  | N/T | N/A |
| Stent insertion?   | <input type="checkbox"/> | yes | <input type="checkbox"/> | no |     |     |
| If yes             | 1                        | 2   | 3                        | 4  | N/T | N/A |

**Cognitive Aspects**

1(**superior**) =appropriate knowledge, requires no instruction 2(**advanced**) =achieves with minimal verbal cues  
 3(**intermediate**) = achieves with multiple verbal cues 4 (**novice**) =poor knowledge unable to achieve endpoint  
 N/T= not attempted N/A= not applicable

|                                                                                     |   |   |   |   |     |     |
|-------------------------------------------------------------------------------------|---|---|---|---|-----|-----|
| Fellow demonstrated clear understanding of indication of procedure                  | 1 | 2 | 3 | 4 | N/T | N/A |
| Pancreatogram                                                                       | 1 | 2 | 3 | 4 | N/T | N/A |
| Appropriate use of fluoroscopy                                                      |   |   |   |   |     |     |
| Ability to identify nature of pathology (stone, stricture, leak, etc.)              | 1 | 2 | 3 | 4 | N/T | N/A |
| Logical plan based on pancreatogram findings                                        | 1 | 2 | 3 | 4 | N/T | N/A |
| Fellow demonstrated clear understanding for appropriate use of rectal indomethacin? | 1 | 2 | 3 | 4 | N/T | N/A |

The EUS and ERCP Skills Assessment Tool (TEESAT)

**Overall Assessment:**

| Overall Assessment (subjective)     |   |   |                               |   |   |                                     |   |   |                                |
|-------------------------------------|---|---|-------------------------------|---|---|-------------------------------------|---|---|--------------------------------|
| 1                                   | 2 | 3 | 4                             | 5 | 6 | 7                                   | 8 | 9 | 10                             |
| Below average for level of training |   |   | Average for level of training |   |   | Above average for level of training |   |   | Superior for level of training |

**Immediate Post-Procedure Complications:**

Procedure done in ambulatory setting? Yes No

Patient admitted post-procedure? Yes No

- If yes,
- Pain requiring hospitalization
  - Pancreatitis
    - Mild Moderate  Severe
  - Bleeding
    - Immediate Delayed
  - Perforation
  - Cardiopulmonary complications
  - Mortality
  - Other: \_\_\_\_\_

Supplementary Figure 3. Continued



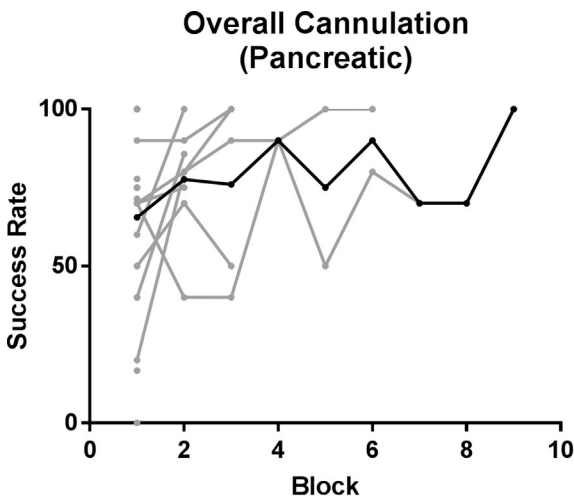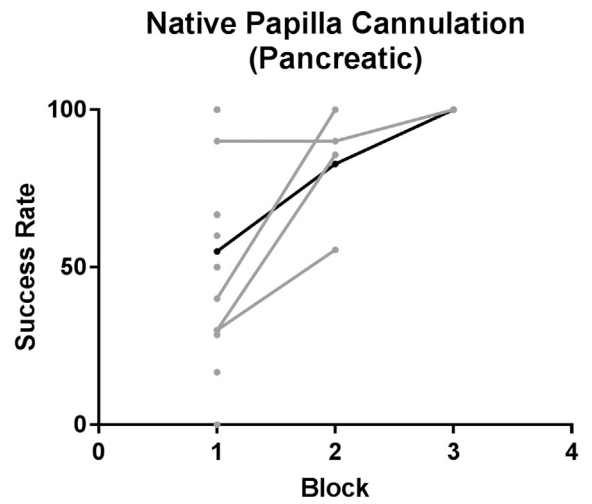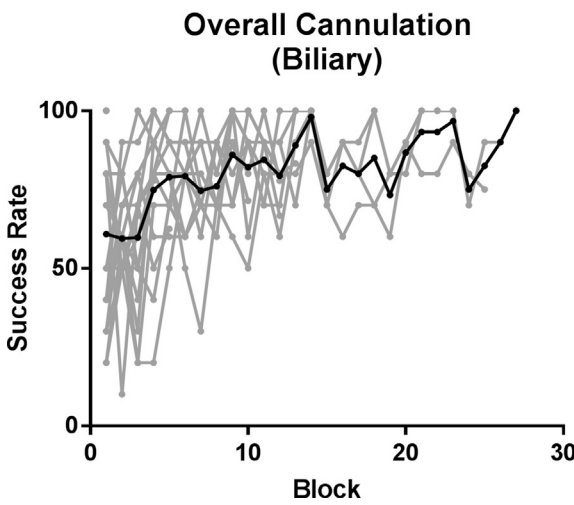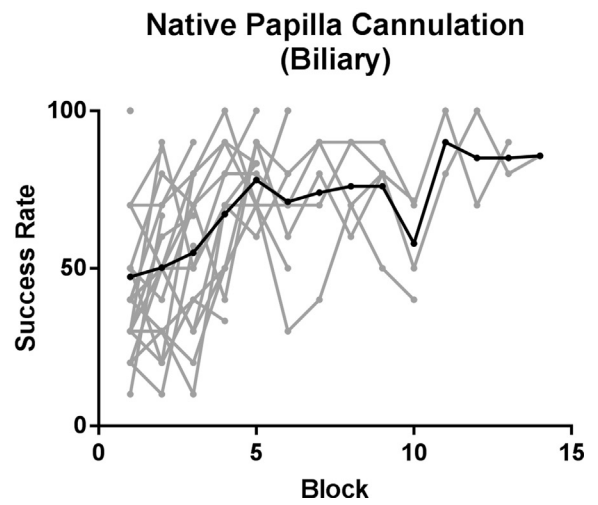

Supplementary Figure 4. Cannulation rates with time.

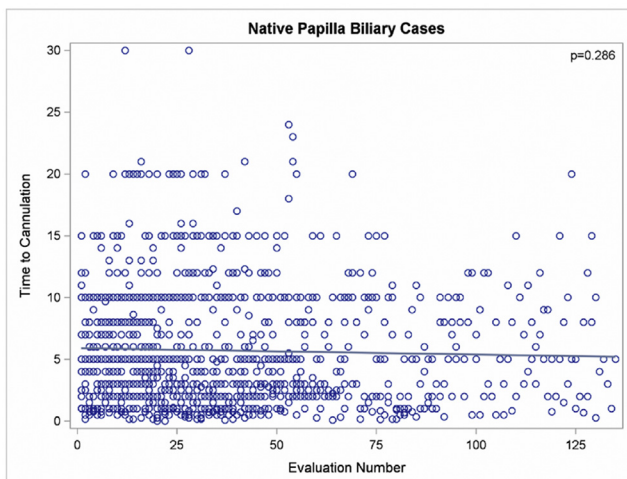

Supplementary Figure 5. Scatter plot demonstrating no change in the time allowed for the advanced endoscopy trainee to cannulate cases with a native papilla during the 1-year training period.

**Supplementary Table 1.** List of Participating Advanced Endoscopy Training Programs

| Institution                                                   | Location                  |
|---------------------------------------------------------------|---------------------------|
| University Hospitals Cleveland Medical Center                 | Cleveland, Ohio           |
| Carolinas Medical Center                                      | Charlotte, North Carolina |
| University of Virginia Health System                          | Charlottesville, Virginia |
| Icahn School of Medicine Mount Sinai                          | New York, New York        |
| Henry Ford Hospital                                           | Detroit, Michigan         |
| Moffitt Cancer Center                                         | Tampa, Florida            |
| Washington University School of Medicine                      | St Louis, Missouri        |
| Geisinger Medical Center                                      | Danville, Pennsylvania    |
| Indiana University                                            | Indianapolis, Indiana     |
| University of Texas Southwestern                              | Dallas, Texas             |
| Northwestern University                                       | Chicago, Illinois         |
| University of Colorado                                        | Aurora, Colorado          |
| Vanderbilt University                                         | Nashville, Tennessee      |
| University of Wisconsin                                       | Madison, Wisconsin        |
| University of California, Los Angeles                         | Los Angeles, California   |
| Digestive Diseases Institute at Virginia Mason Medical Center | Seattle, Washington       |
| Dartmouth Hitchcock Medical Center                            | Lebanon, New Hampshire    |
| University of Kansas                                          | Kansas City, Kansas       |
| Brigham and Women's Hospital                                  | Boston, Massachusetts     |
| The University of Texas Health Science Center at San Antonio  | San Antonio, Texas        |

**Supplementary Table 2.** Comparison of Competence in EUS and ERCP by Using TEESAT and a Global Rating Scale

| Stu                 | No. of AETs meeting inclusion criteria | No. of evaluations | No. of AETs achieving competence (%), primary analysis <sup>a</sup> | No. of AETs achieving competence (%), sensitivity analysis <sup>b</sup> |
|---------------------|----------------------------------------|--------------------|---------------------------------------------------------------------|-------------------------------------------------------------------------|
| <b>EUS</b>          |                                        |                    |                                                                     |                                                                         |
| Overall technical   | 17                                     | 1070               | 14 (82.3)                                                           | 11 (64.7)                                                               |
| Overall cognitive   | 17                                     | 1061               | 13 (76.4)                                                           | 8 (47)                                                                  |
| Global rating scale | 17                                     | 1066               | 10 (58.8)                                                           | 0 (0)                                                                   |
| <b>ERCP biliary</b> |                                        |                    |                                                                     |                                                                         |
| Overall technical   | 20                                     | 2259               | 12 (60)                                                             | 5 (25)                                                                  |
| Overall cognitive   | 20                                     | 2268               | 20 (100)                                                            | 17 (85)                                                                 |
| Global rating scale | 20                                     | 2263               | 10 (50)                                                             | 1 (5)                                                                   |

<sup>a</sup>Primary analysis: success defined as score of 1 or 2 (no assistance/minimal verbal cues); acceptable failure rate,  $p0 = 0.1$  and unacceptable failure rate,  $p1 = 0.3$ .  
Global rating scale: success defined as score of 7–10.

<sup>b</sup>Sensitivity analysis: success defined as score of 1 (stringent definition of success); global rating scale: success defined as score of 10.

**Supplementary Table 3.** Results of the Post-Study Questionnaire Assessing Comfort Level in EUS and ERCP After Completion of Advanced Endoscopy Training

| Post-training questions                                                           | Strongly agree, % (n) | Tend to agree (n) | Neutral, % (n) | Tend to disagree, % (n) | Strongly disagree, % (n) |
|-----------------------------------------------------------------------------------|-----------------------|-------------------|----------------|-------------------------|--------------------------|
| I feel comfortable independently performing ERCP                                  | 53.8 (7)              | 46.2 (6)          | 0 (0)          | 0 (0)                   | 0 (0)                    |
| I feel comfortable with deep cannulation of duct of interest                      | 53.8 (7)              | 38.5 (5)          | 7.7 (1)        | 0 (0)                   | 0 (0)                    |
| I feel comfortable performing sphincterotomy                                      | 61.5 (8)              | 23.1 (3)          | 7.7 (1)        | 7.7 (1)                 | 0 (0)                    |
| I feel comfortable with stone clearance                                           | 76.9 (10)             | 15.4 (2)          | 7.7 (1)        | 0 (0)                   | 0 (0)                    |
| I feel comfortable with placement of biliary stents                               | 84.6 (11)             | 15.4 (2)          | 0 (0)          | 0 (0)                   | 0 (0)                    |
| I feel comfortable with placement of pancreatic stents                            | 46.2 (6)              | 46.2 (6)          | 7.7 (1)        | 0 (0)                   | 0 (0)                    |
| I feel comfortable with independently performing EUS                              | 38.5 (5)              | 46.2 (6)          | 7.7 (1)        | 7.7 (1)                 | 0 (0)                    |
| I feel comfortable performing EUS-FNA                                             | 61.5 (8)              | 30.8 (4)          | 7.7 (1)        | 0 (0)                   | 0 (0)                    |
| I feel comfortable performing celiac plexus block/neurolysis                      | 46.2 (6)              | 38.5 (5)          | 7.7 (1)        | 0 (0)                   | 7.7 (1)                  |
| I feel comfortable placing fiducials                                              | 16.7 (2)              | 25 (3)            | 8.3 (1)        | 25 (3)                  | 25 (3)                   |
| I feel comfortable performing pseudocyst drainage                                 | 38.5 (5)              | 46.2 (6)          | 7.7 (1)        | 7.7 (1)                 | 0 (0)                    |
| I feel comfortable performing biliary/pancreatic EUS-guided rendezvous procedures | 0                     | 23.1 (3)          | 23.1 (3)       | 30.8 (4)                | 23.1 (3)                 |

**Supplementary Table 4.** Results of Post-Study Questionnaire Assessing Plans for Independent Practice

|                                                                                                             |                                                                                                   |
|-------------------------------------------------------------------------------------------------------------|---------------------------------------------------------------------------------------------------|
| What type of environment will you be practicing in? (n, %)                                                  | Academic (6, 46.2)<br>Private (5, 38.5)<br>Combination of academic and private practice (2, 15.4) |
| Will you be joining a practice with a senior partner who performs high-volume ERCP and/or EUS? (n, %)       | Yes (11, 84.6)<br>No (2, 15.4)                                                                    |
| What % of your job will be "advanced endoscopy?" (n, %)                                                     | 0 (0, 0)<br>1–25 (2, 15.4)<br>26–50 (5, 38.5)<br>51–75 (2, 15.4)<br>>75 (4, 30.8)                 |
| How many EUS procedures do you estimate you will perform in the first year of independent practice? (n, %)  | Mean, 187.5<br>Median, 155 (range, 25–500)                                                        |
| How many ERCP procedures do you estimate you will perform in the first year of independent practice? (n, %) | Mean, 155<br>Median, 175 (range, 25–300)                                                          |

**Supplementary Table 5.** Comparison of AET Programs

|                                 | Programs included in RATES study (n = 20) | Programs not included in RATES study (n = 42) | P value |
|---------------------------------|-------------------------------------------|-----------------------------------------------|---------|
| No. of AETs (median)            | 1 (1–2)                                   | 1 (1–2)                                       | <.21    |
| No. of ERCP procedures (median) | 480 (300–800)                             | 450 (225–1015)                                | <.36    |
| No. of EUS procedures (median)  | 450 (300–1200)                            | 400 (300–950)                                 | <.35    |

RATES, Rapid Assessment of Trainee Endoscopy Skills.
